# Supplementary material
Source: Springer Nature journal article supplement (https://www.springermedizin.de/resource/supplementary/12887_2014_1076_MOESM1_ESM.pdf/9476448)
Supplement: MOESM1 [file 9476448]

## Enrollment

Eligible infants 3-8 months with signs of asymmetric hand function:

Not eligible or not interested.  
No further contact

Expect to recruit 90% of eligible

Randomized matching for age and brain lesion characteristics

## Allocation

Allocated to baby-CIMT (n=16)  
Received allocated intervention 6 weeks (first period)

Allocated to baby-Massage (n=16)  
Received allocated intervention 6 weeks (first period)

First outcome completion, week 6

Resting state/wash out 6-12 weeks

Second outcome completion, week 12

Allocated to Baby-CIMT (n=16)  
Received allocated intervention 6 weeks (second period 12-18 weeks)

Allocated to Baby-Massage (n=16)  
Received allocated intervention 6 weeks (second period 12-18 weeks)

Third outcome completion, week 18

Primary post treatment outcome at the child's age of 12 months

Retention outcome at 2 years of age

## Outcome measure and time points

### Baseline, week 0 (training start)

Primary outcome Measure:  
HAI  
Secondary Outcome Measure  
AIMS  
PSCS

### 6 week, Outcome Measure

HAI  
12 weeks, Outcome Measure  
HAI  
18 week, Outcome measure  
HAI

### At the child's age of 12 months

Primary outcome Measure:  
HAI  
Secondary Outcome Measure  
AIMS  
PSCS  
Neurological examination

### At the child's age of 2 years

Primary outcome Measure:  
AHA  
Neurological examination
